# Supplementary material
Source: PubMed Central journal article supplement (PMC2234782)

### Normal specimens

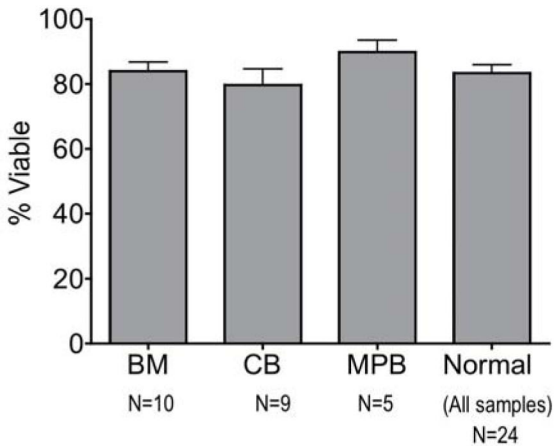

Supplement: blood_blood-2007-05-088815_1.pdf [file blood_blood-2007-05-088815_1.pdf]
